# Supplementary material for: When the patient “goes under” without induction: psychogenic unresponsiveness mimicking general anesthesia — a case report
Source: Research Square preprint supplement (doi:10.21203/rs.3.rs-8089665/v1), 2025-12-18
Supplement: Supplementary file 1 [file 1f60f60be1b29092b7344df2.docx]

**CARE (CAse REport) Checklist – Completed for Submission**

Manuscript title: When the patient “goes under” without induction: psychogenic unresponsiveness mimicking general anesthesia — a case report

Journal: BMC Anesthesiology

This checklist follows the CARE guidelines (CARE 2013/2017). It documents where each reporting item is addressed in the manuscript. For items that are not applicable, “N/A” is indicated. Line/page numbers can be added after pagination if desired.

| CARE item | Requirement | How addressed in this manuscript | Section/Location |
| --- | --- | --- | --- |
| 1. Title | Identify the report as a case report; include phenomenon of interest | Title identifies a case report and the phenomenon (psychogenic unresponsiveness mimicking anesthesia). | Title page |
| 2. Keywords | 3–10 keywords | Provided (Psychogenic coma; Functional neurological disorder; …) | Keywords |
| 3. Abstract | Structured: Background, Case presentation, Conclusions; no references | Structured abstract with Background / Case presentation / Conclusions. | Abstract |
| 4. Introduction (Background) | Brief context and rationale; objectives | Explains perioperative unresponsiveness and rationale for report. | Background |
| 5. Patient information | De-identified demographics, chief concerns, medical/family/social history | 72-year-old woman; diabetes, dementia, epilepsy; meds summarized; prior events. | Case presentation |
| 6. Clinical findings | Relevant physical exam findings | Unresponsiveness with preserved respiration; vitals documented; neuro signs (pupils, tone). | Case presentation |
| 7. Timeline | Important dates in a timeline figure or narrative | Two episodes dated 10/30 and 10/31/2025; perioperative sequence described. | Case presentation |
| 8. Diagnostic assessment | Differentials, tests, reasoning; diagnostic challenges; prognostic characteristics | Differential (metabolic, neurologic, functional); POC glucose; CT/CTA; EEG; reasoning discussed. | Case presentation; Discussion |
| 9. Therapeutic intervention | Types, administration, changes | Hyperglycemia correction (insulin); decision to delay surgery; regional anesthesia without sedatives. | Case presentation |
| 10. Follow-up and outcomes | Clinical course, outcomes, patient-reported outcomes if available | Spontaneous recovery to baseline; discharge. | Case presentation |
| 11. Discussion | Strengths/limitations, literature review, rationale for conclusions, key takeaways | Literature context and implications for anesthesiology practice; limitations noted implicitly. | Discussion and Conclusions |
| 12. Patient perspective | Patient’s or caregiver’s perspective when available | N/A (patient has dementia; caregiver perspective not recorded). | N/A |
| 13. Informed consent | Consent for publication of case details/images | Written consent from legally authorized representative obtained; stated in Declarations. | Declarations – Consent for publication |
| 14. Diagnostic challenges | Access to care, cultural/organizational issues, technical limitations | EEG technically limited; perioperative context; decision to postpone surgery. | Case presentation; Discussion |
| 15. Adverse events | Adverse or unanticipated events | Unexpected unresponsiveness; no harm from unnecessary interventions due to proper triage. | Case presentation |
| 16. Conclusions (take‑home message) | Key lessons | Algorithmic bedside approach; avoid iatrogenesis; multidisciplinary coordination. | Discussion and Conclusions |
| 17. Ethics statement | IRB/ethics requirements and justification | Single-patient case report; IRB review not required per institutional policy; stated in Declarations. | Declarations – Ethics approval |

Declaration regarding IRB: Per institutional policy, single-patient case reports do not constitute human subjects research and do not require IRB review. This is stated in the manuscript Declarations.

Declaration regarding identifiers: All potentially identifying information has been removed or anonymized.
